# Supplementary material for: Redundancy in Anaerobic Digestion Microbiomes during Disturbances by the Antibiotic Monensin
Source: PubMed Central journal article supplement (PMC5930344; doi:10.1128/aem.02692-17), 2018-04-16
Supplement: AEM.02692-17_zam009188496s1.pdf [file AEM.02692-17_zam009188496s1.pdf]

## Supplementary Material

# Redundancy of anaerobic digestion microbiomes during disturbances by the antibiotic monensin

Running Title: Monensin impact on stability of digester microbiomes

Catherine M. Spirito<sup>1</sup>, Sarah E. Daly<sup>1</sup>, Jeffrey J. Werner<sup>2</sup>, Largus T. Angenent<sup>1,3\*</sup>

<sup>1</sup> Department of Biological and Environmental Engineering, Cornell University, Ithaca, NY, USA.

<sup>2</sup> Chemistry Department, SUNY-Cortland, Cortland, NY, USA

<sup>3</sup> Center for Applied Geosciences, University of Tübingen, Tübingen, Germany

\*Correspondence to:

**L. T. Angenent**

Center for Applied GeoSciences | University of Tübingen | Hölderlinstr. 12, 72074

Tübingen, Germany | Ph. +49-7071-601-322 | [l.angenent@uni-tuebingen.de](mailto:l.angenent@uni-tuebingen.de)

## Figures

### Figure Captions

**Figure S1:** Monensin concentration measured in manure vs. monensin concentration measured in the consumed cow feed (on a dry matter basis in  $\text{mg}\cdot\text{kg}^{-1}$ ). The monensin excretion rate for the cows was calculated as the slope of the best-fit line for the plot.

**Figure S2:**  $\beta$ -diversity of gut microbiome samples from cow hindguts from the control cows and monensin-dosed cows: **A)** PCoA based on unweighted Unifrac distance. The samples were collected starting in the two weeks prior to monensin dosing through to end of the monensin dosing period (three months total). The samples are colored based on which cow they were collected from. Square shapes represent samples collected when the cows were dosed with monensin, while circles represent time periods when the cows were not fed monensin; and **B)** PCoA of unweighted Unifrac distance of combined manure substrates that were fed to anaerobic digesters. Red shading represents the concentration of monensin measured in the manure (M0, M200, M300, M400, and M500).

**Figure S3:** Plot of phyla that reached over 10% relative abundance in any one anaerobic digester sample from Day 175 to the end of the operating period for each of the anaerobic digesters: **A)** Low A; **B)** Low B; **C)** Fast; and **D)** Slow anaerobic digester. Shading represents periods.

**Figure S4:** Averaged observed OTUs (richness) metric during different periods for each of the anaerobic digesters: **A)** Low A; **B)** Low B; **C)** Fast; and **D)** Slow anaerobic digester.

**Figure S5:** Averaged Gini coefficient (unevenness) metric during different periods for each of the anaerobic digesters: **A)** Low A; **B)** Low B; **C)** Fast; and **D)** Slow anaerobic digester.

**Figure S6:** Bipartite network analysis of OTU associations with samples throughout the operating period of the Slow reactor, with samples colored light to dark purple chronologically (**A**). We looked separately at OTUs associated with the “Late” final eight time points of P4 from Day 329 to 383 (**B**; highlighted in yellow) and the “Early” P1-P3 samples from Day 115 to 306 (**C**; highlighted in yellow). Intersecting OTUs that appeared in both the Early and Late samples were removed, and the taxonomies of OTUs exclusive to either early or late samples were summarized (**D**), according to major taxonomic groupings that exceeded 2% relative abundance. Abundance in the transitional time points between Day 307 to 328 (not highlighted) were left out of the averages. The network visualization was created using the spring-embedded layout model in Cytoscape, using only OTUs that appeared in more than two samples and fewer than 66% of the samples.

**Figure S1**

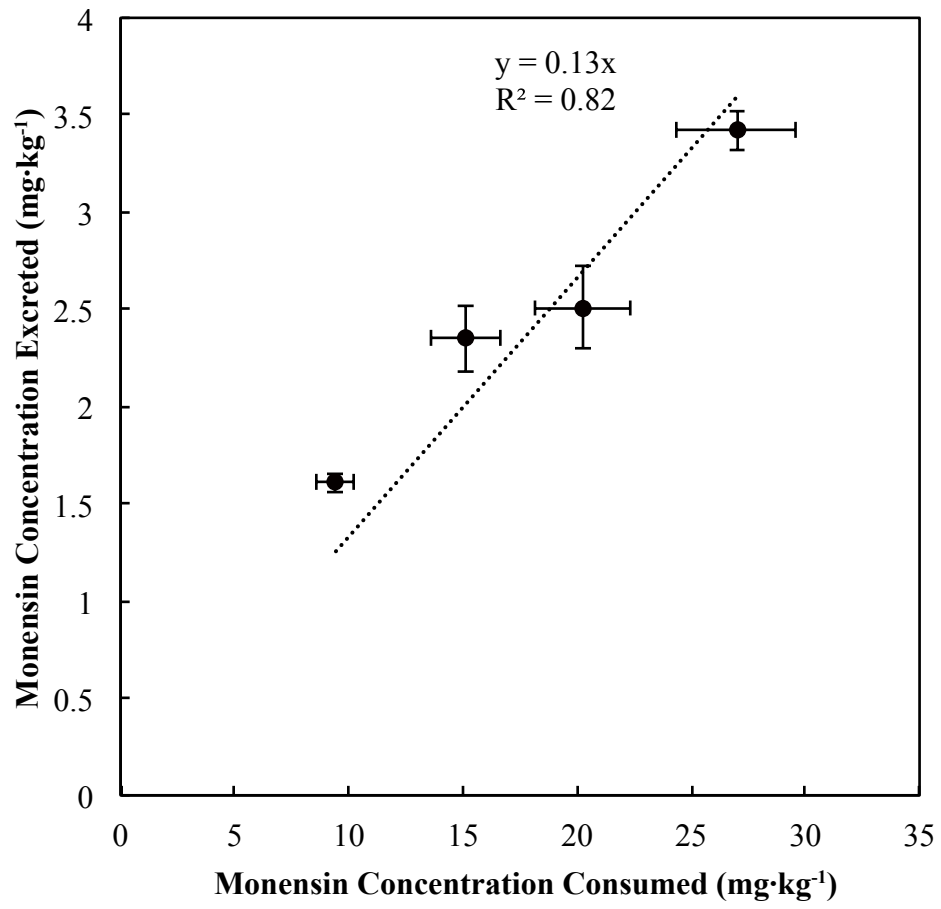

Figure S2

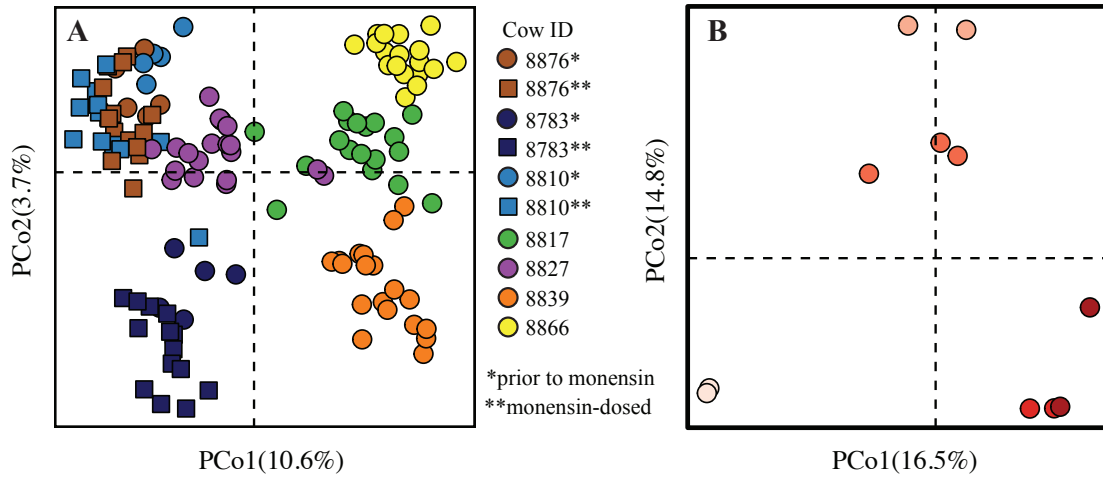

Figure S3

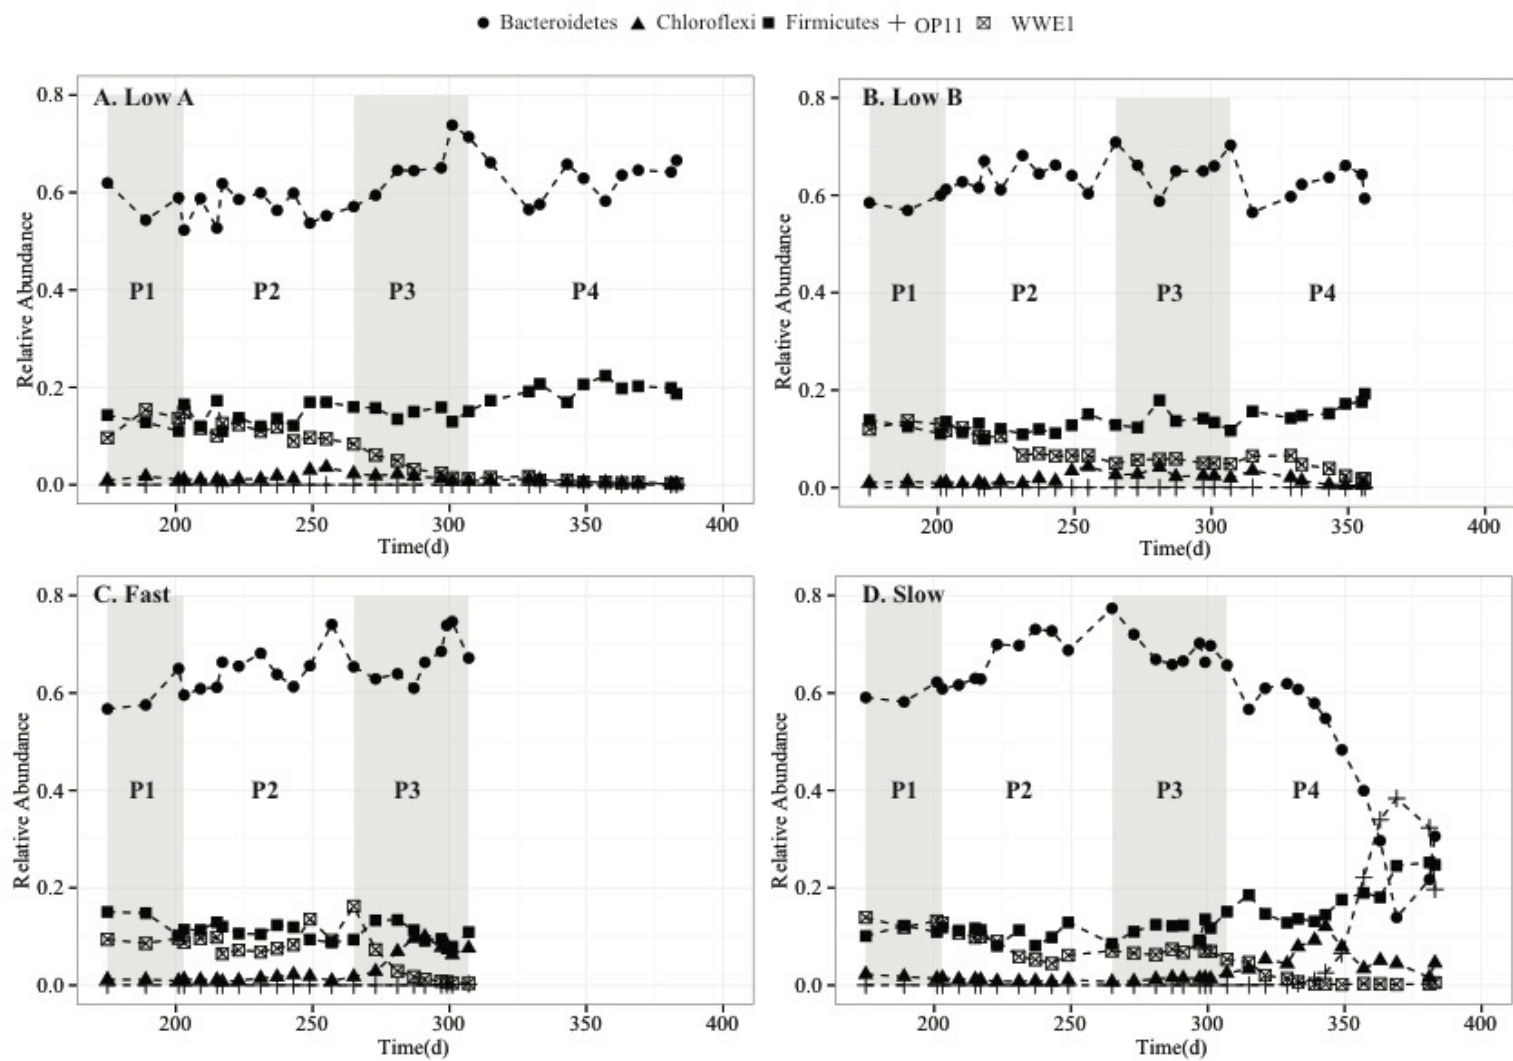

**Figure S4**

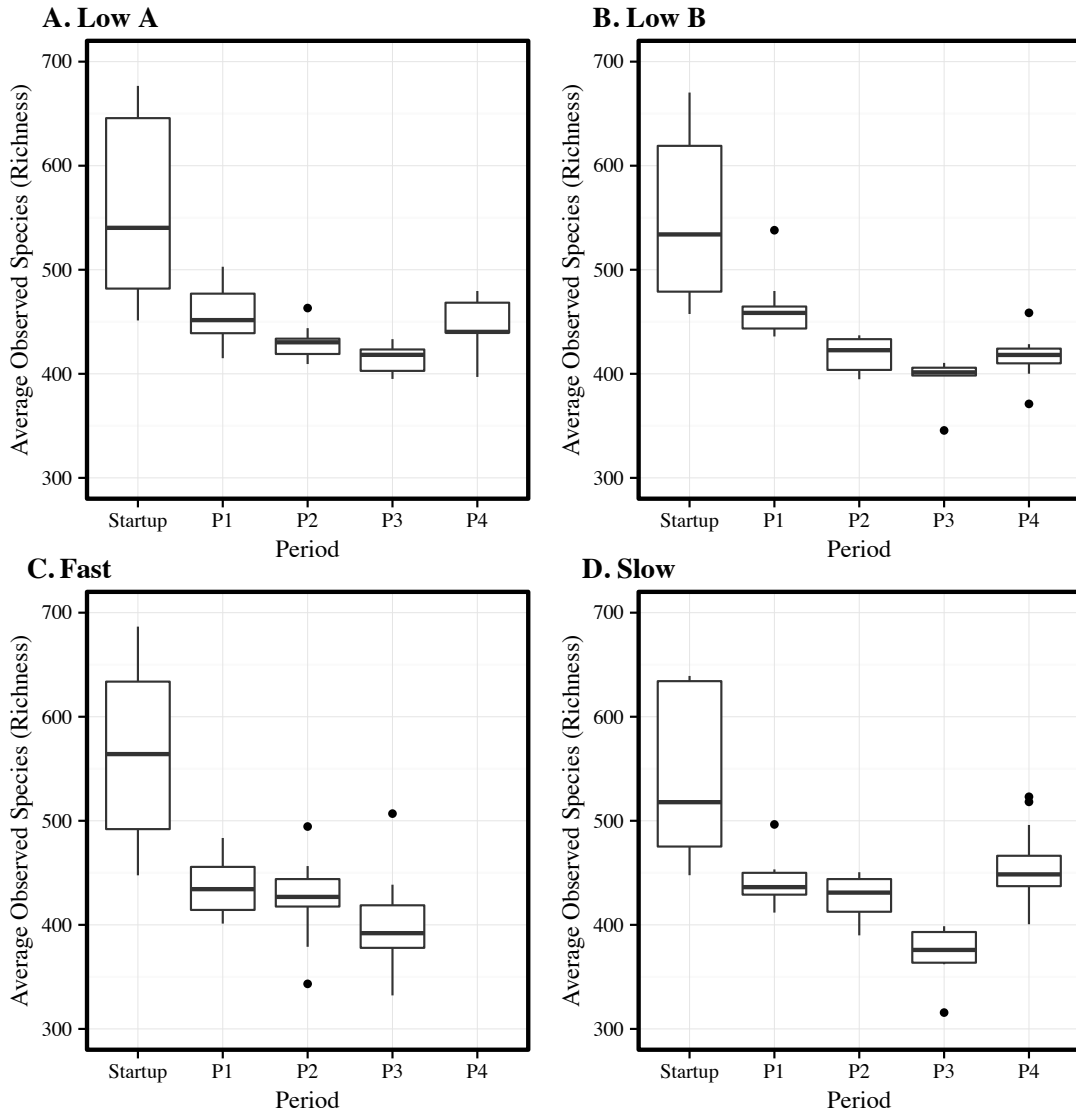

**Figure S5**

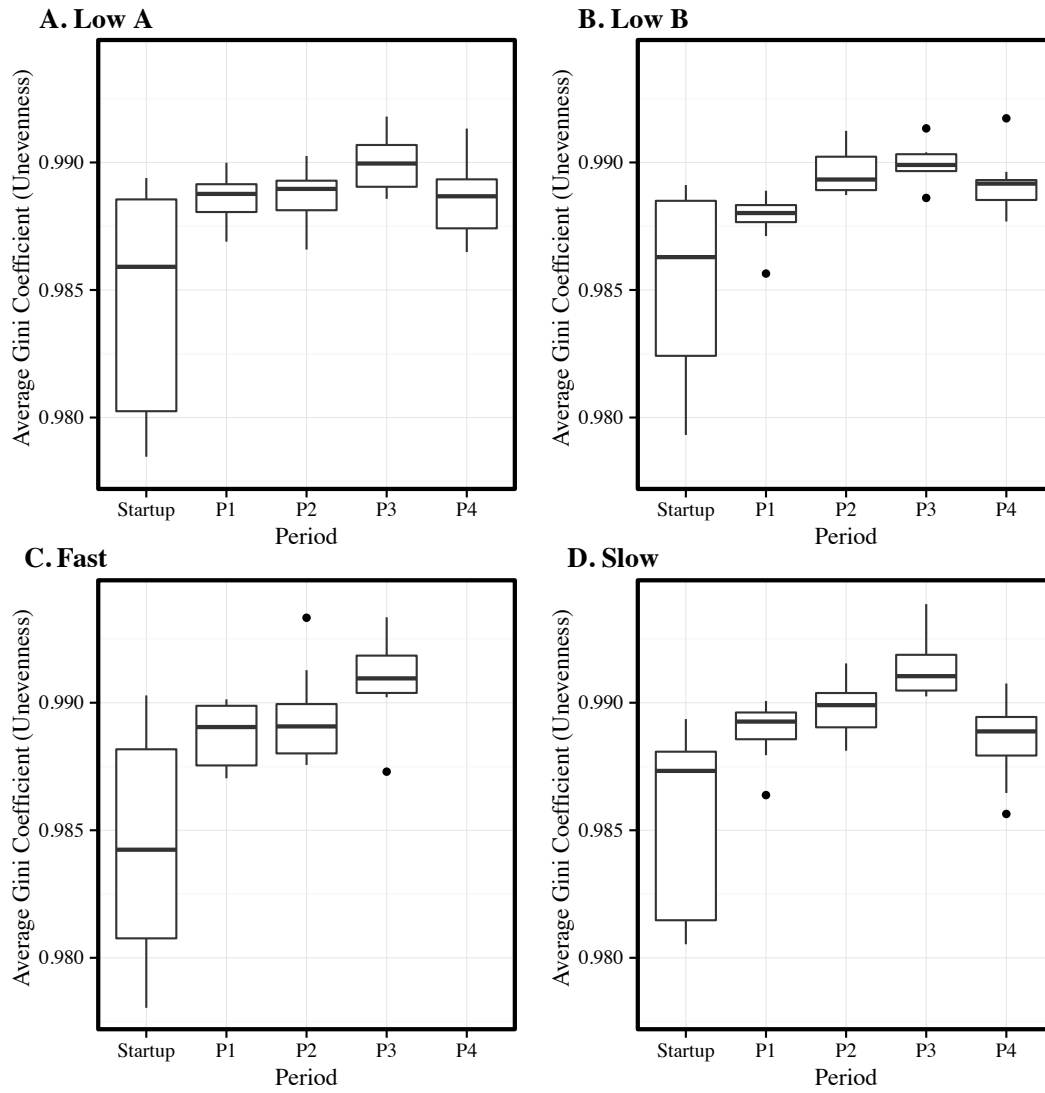

Figure S6

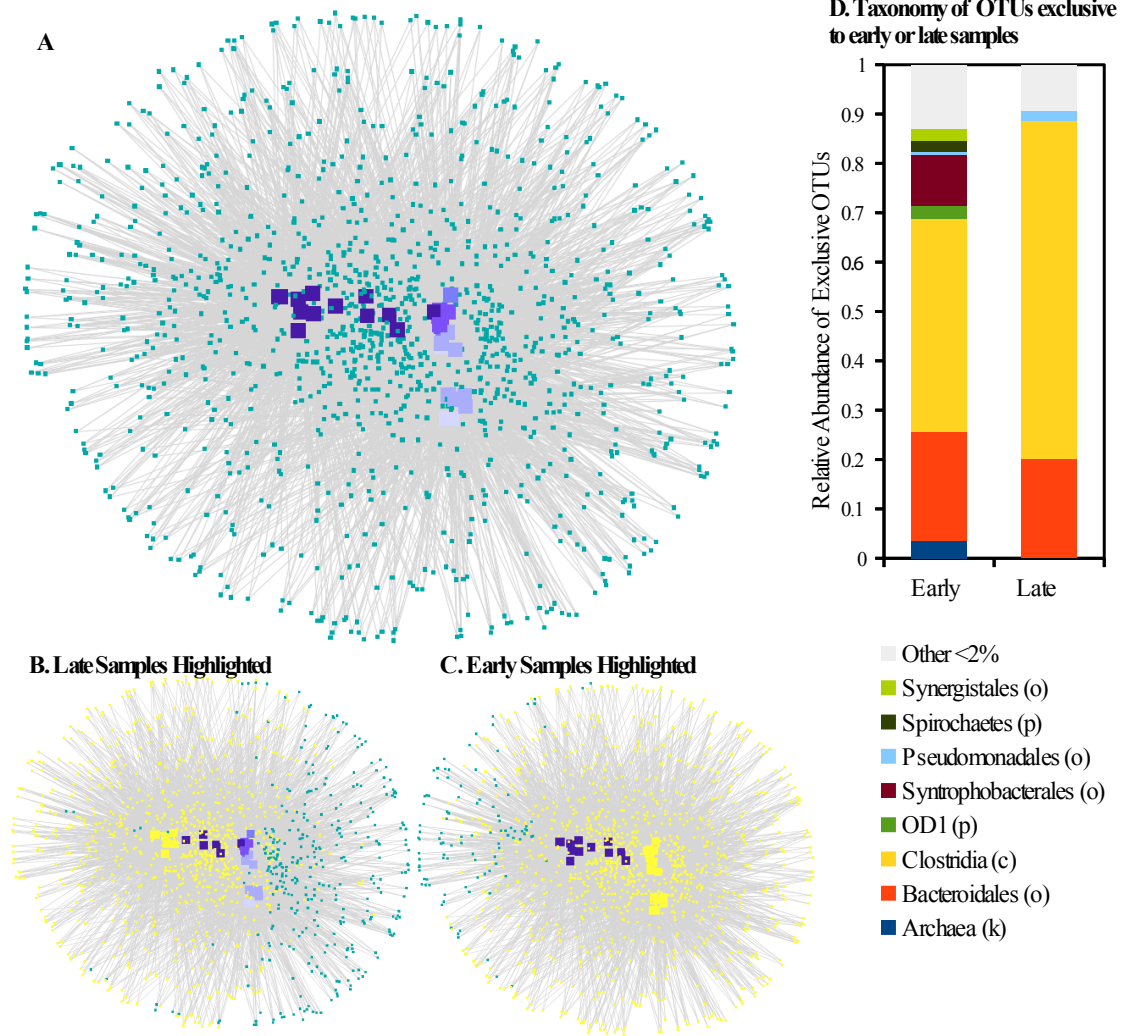



## Tables

### Table Captions

**Table S1:** Physical and chemical data from manure characterization. Values are bold when significant differences from control manure values were observed ( $p < 0.05$ ). Star (\*) indicates whether the monensin manure remained significantly different after considering the dilutions of the manures. Errors are represented as standard deviations.

**Table S2:** Relative abundance (%) of taxa families in the manure substrate samples. Only families that reached at least 1% relative abundance in any one manure substrate sample were included in the table. This resulted in 17 families that represented an average of 95.33% of the total composition of the manures. Taxa that were unclassified to the family level are included in the table (*i.e.*, Bacteroidales Unknown Family in table represents all OTUs that were classified to the order Bacteroidales but were unclassified at the family level). M0 refers to the manure from the control cows. M200, M300, M400, and M500 refer to the four batches of manure collected from the monensin-dosed cows (corresponding to the 194, 320, 432, and 546  $\text{mg} \cdot \text{d}^{-1}$  monensin-dosing rates, respectively). Duplicate or triplicate samples were run from each manure substrate and are shown in the table as separate entries.

**Table S3:** Average relative abundance (%) of taxa families in the seven digester inoculum (Day 0) samples. Only families that reached at least 1% relative abundance in any one digester inoculum sample are included in this table. Taxa that were unclassified to the family level are included in the table (*i.e.*, Bacteroidales Unknown Family in table represents all OTUs that were classified to the order Bacteroidales but were unclassified at the family level). This resulted in 20 families that represent 86.10% of the total composition of the inoculum samples.

**Table S4:** Performance parameters measured for each anaerobic digester. Errors are represented as standard deviations.

**Table S5:** Stability parameters measured for each anaerobic digester, reported as averages for each period. Errors are represented as standard deviations. The average total VFAs reported in this table were measured using the distillation method (5560C) outlined in the Standard Methods for the Examination of Water and Wastewater, 21<sup>st</sup> ed.

**Table S6:** Individual VFA (acetate, propionate, and *n*-butyrate) concentrations (mM) were measured by gas chromatography (gas chromatograph equipped with flame ionization detector; see main methods section). Total VFA concentrations ( $\text{mmol Ac} \cdot \text{L}^{-1}$ ) were measured using the distillation method (5560C) outlined in the Standard Methods for the Examination of Water and Wastewater, 21<sup>st</sup> ed. Values in this table are individual measurements made on the day indicated.

**Table S7:** OTUs positively correlated (Spearman's rank correlation,  $\rho > 0.5$ ,  $p < 0.001$ ) with monensin concentrations in the substrate for the Slow anaerobic digester from Day

175 on. Table also indicates if the OTU was positively correlated with monensin concentrations in the Fast anaerobic digester (Y=yes; N=no) and if it was positively correlated with monensin concentrations in all anaerobic digesters (*i.e.*, Low A, Low B, Fast, and Slow). Only OTUs that reached a min of 1% relative abundance in at least one anaerobic digester sample (from Day 175 on) are included.

**Table S8:** OTUs negatively correlated (Spearman's rank correlation,  $\rho < -0.5$ ,  $p < 0.001$ ) with monensin concentrations in substrate for the Slow anaerobic digester from Day 175 on. Table also indicates if the OTU was negatively correlated with monensin concentrations in the Fast anaerobic digester (Y=yes; N=no) and if it was negatively correlated with monensin concentrations in all anaerobic digesters (*i.e.*, Low A, Low B, Fast, and Slow). Only OTUs that reached a min of 1% relative abundance in at least one anaerobic digester sample (from Day 175 on) are included.

**Table S9:** Anaerobic digester biomass samples. In addition to these samples, ten manure substrate samples were sequenced (duplicate samples from each manure batch), as well as the cow hindgut samples.

**Table S1**

| Measured parameters                                             | Manures        |                    |                     |                     |                     |
|-----------------------------------------------------------------|----------------|--------------------|---------------------|---------------------|---------------------|
|                                                                 | M0             | M200               | M300                | M400                | M500                |
| Dilution Factor (g raw manure per g diluted manure basis)       | 0.391          | 0.372              | 0.392               | 0.379               | 0.359               |
| Monensin-Dosing Rate (mg·d <sup>-1</sup> )                      | ND             | 194 ± 1            | 320 ± 46            | 432 ± 19            | 546 ± 51            |
| Monensin Concentration, wet matter basis (mg·L <sup>-1</sup> )  | ND             | 0.239 ± 0.009      | 0.337 ± 0.008       | 0.371 ± 0.013       | 0.543 ± 0.011       |
| Monensin Concentration, dry matter basis (mg·kg <sup>-1</sup> ) | ND             | 1.610 ± 0.050      | 2.350 ± 0.170       | 2.510 ± 0.210       | 3.420 ± 0.100       |
| pH                                                              | 7.05 ± 0.22    | 7.19 ± 0.04        | <b>7.58 ± 0.04*</b> | <b>7.56 ± 0.11*</b> | <b>7.55 ± 0.16*</b> |
| Gross Energy (cal·g <sup>-1</sup> )                             | 4590 ± 22      | 4607 ± 37          | 4583 ± 53           | 4543 ± 23           | 4612 ± 52           |
| Total VFAs Concentration (mg Ac·L <sup>-1</sup> )               | 6416 ± 194     | <b>5168 ± 125*</b> | <b>5576 ± 338*</b>  | 6212 ± 441          | 5861 ± 372*         |
| Acetate/Propionate Ratio                                        | 7.3 ± 0.1      | 6.5 ± 0.5          | 7.0 ± 0.2           | <b>9.0 ± 0.4*</b>   | 8.0 ± 0.7           |
| TS Concentration (g·L <sup>-1</sup> )                           | 140 ± 1.9      | <b>143.3 ± 4.7</b> | 142.2 ± 1.6         | <b>144.2 ± 2.5</b>  | <b>156.1 ± 3</b>    |
| VS Concentration (g·L <sup>-1</sup> )                           | 126.8 ± 2.1    | <b>130.0 ± 4.8</b> | 127.0 ± 1.6         | 129.7 ± 2.5         | <b>141.3 ± 3.0</b>  |
| Total COD Concentration (g O <sub>2</sub> ·L <sup>-1</sup> )    | 135.07 ± 19.47 | 146.00 ± 18.77     | 145.60 ± 14.35      | 118.40 ± 18.88      | 136.80 ± 13.49      |
| Soluble COD Concentration (g O <sub>2</sub> ·L <sup>-1</sup> )  | 24.40 ± 1.31   | 23.09 ± 0.72       | 26.67 ± 1.34        | 24.27 ± 2.36        | 23.20 ± 3.47        |
| Total Alkalinity (g CaCO <sub>3</sub> ·L <sup>-1</sup> )        | 9.3 ± 0.1      | <b>10.4 ± 0.1*</b> | <b>12.6 ± 0.3*</b>  | <b>12.5 ± 0.1*</b>  | <b>12.4 ± 0.1*</b>  |
| Total Ammonium Concentration (g N·L <sup>-1</sup> )             | 1.00 ± 0.04    | 0.90 ± 0.04        | <b>1.44 ± 0.05*</b> | <b>1.82 ± 0.18*</b> | <b>1.97 ± 0.12*</b> |

**Table S2**

| Family Name                           | Relative Abundance of Taxa Family in Manures (%) |       |       |       |       |       |       |       |       |       |       |
|---------------------------------------|--------------------------------------------------|-------|-------|-------|-------|-------|-------|-------|-------|-------|-------|
|                                       | M0                                               | M0    | M200  | M200  | M300  | M300  | M300  | M400  | M400  | M500  | M500  |
| Aerococcaceae                         | 0.81                                             | 1.55  | 1.50  | 1.59  | 9.09  | 8.95  | 1.29  | 16.95 | 17.09 | 19.24 | 21.26 |
| Bacteroidaceae                        | 1.32                                             | 1.18  | 1.03  | 0.99  | 1.57  | 1.21  | 1.80  | 0.92  | 0.96  | 0.52  | 0.77  |
| Bacteroidales Family S24-7            | 4.48                                             | 3.68  | 2.76  | 2.65  | 3.09  | 2.44  | 3.22  | 1.55  | 1.67  | 1.61  | 1.70  |
| Bacteroidales Unknown Family          | 8.35                                             | 10.81 | 4.76  | 3.97  | 8.09  | 5.73  | 7.60  | 1.99  | 2.45  | 2.57  | 3.33  |
| Bifidobacteriaceae                    | 5.67                                             | 5.12  | 0.10  | 0.10  | 0.06  | 0.07  | 0.06  | 1.47  | 1.11  | 0.84  | 0.88  |
| Carnobacteriaceae                     | 0.61                                             | 3.60  | 1.54  | 1.81  | 13.20 | 21.67 | 1.74  | 19.48 | 19.59 | 19.63 | 15.14 |
| Clostridiaceae                        | 4.85                                             | 4.17  | 7.82  | 8.53  | 3.57  | 2.82  | 5.77  | 3.03  | 2.90  | 5.52  | 6.25  |
| Clostridiales Unknown Family          | 10.07                                            | 9.17  | 17.45 | 17.70 | 9.40  | 8.05  | 11.96 | 8.43  | 8.47  | 6.74  | 6.74  |
| Erysipelotrichaceae                   | 1.22                                             | 0.73  | 0.49  | 0.36  | 0.81  | 0.58  | 0.75  | 0.56  | 0.49  | 0.37  | 0.38  |
| Lachnospiraceae                       | 7.50                                             | 6.85  | 6.48  | 7.84  | 6.49  | 5.30  | 8.78  | 6.07  | 5.89  | 7.04  | 5.64  |
| Methanobacteriaceae                   | 1.73                                             | 1.76  | 0.77  | 0.62  | 1.04  | 0.74  | 0.71  | 0.81  | 0.59  | 1.12  | 1.10  |
| Mollicutes RF39 Order, Unknown Family | 5.95                                             | 6.20  | 10.15 | 9.12  | 5.49  | 5.24  | 5.49  | 4.84  | 4.88  | 3.08  | 3.52  |
| Moraxellaceae                         | 0.37                                             | 0.32  | 0.25  | 0.24  | 0.08  | 0.08  | 0.10  | 0.44  | 0.54  | 1.32  | 0.84  |
| Rikenellaceae                         | 0.99                                             | 0.83  | 0.96  | 0.89  | 1.36  | 1.15  | 1.40  | 0.49  | 0.59  | 0.37  | 0.55  |
| Ruminococcaceae                       | 41.17                                            | 39.55 | 38.74 | 38.48 | 30.01 | 30.21 | 43.55 | 27.47 | 27.76 | 24.25 | 25.57 |
| Staphylococcaceae                     | 0.03                                             | 0.07  | 0.28  | 0.29  | 0.24  | 0.25  | 0.12  | 0.67  | 0.54  | 0.69  | 1.25  |
| Turicibacteraceae                     | 0.45                                             | 0.44  | 0.08  | 0.09  | 1.26  | 0.90  | 0.89  | 0.17  | 0.11  | 0.14  | 0.16  |

**Table S3**

| <b>Taxa Family</b>                                      | <b>Percent Average Relative Abundance (mean±sd)</b> |
|---------------------------------------------------------|-----------------------------------------------------|
| Anaerolinaceae                                          | 6.27±0.69                                           |
| Bacteroidales Family SB-1                               | 0.96±0.09                                           |
| Bacteroidales Unknown Family                            | 26.00±1.58                                          |
| Cloacamonaceae                                          | 9.23±1.26                                           |
| Clostridia order SHA-98, Unknown Family                 | 2.69±0.43                                           |
| Clostridia Unknown Family                               | 1.01±0.10                                           |
| Comamonadaceae                                          | 1.79±0.26                                           |
| Geobacteraceae                                          | 2.66±0.40                                           |
| Methanobacteriaceae                                     | 7.86±1.33                                           |
| Methanosaetaceae                                        | 1.41±0.29                                           |
| Moraxellaceae                                           | 2.50±1.66                                           |
| OP8 Candidate Phylum, Class OP8_2, Unknown Family       | 1.12±0.18                                           |
| Pseudomonadaceae                                        | 3.28±1.42                                           |
| Spirochaetaceae                                         | 5.60±1.53                                           |
| Syntrophaceae                                           | 1.57±0.20                                           |
| Syntrophobacteraceae                                    | 1.59±0.26                                           |
| Syntrophomonadaceae                                     | 0.91±0.10                                           |
| Tenericutes, class RF3, order ML615J-28, Unknown Family | 1.70±0.27                                           |
| Thermotogaceae                                          | 2.96±0.64                                           |
| Tissierellaceae                                         | 4.98±0.96                                           |

**Table S4**

| <b>Period</b>                                                                   | <b>Startup (Days 1-114)</b>        |               |               |               | <b>Period 1 (P1; Days 115-202)</b> |               |               |               |
|---------------------------------------------------------------------------------|------------------------------------|---------------|---------------|---------------|------------------------------------|---------------|---------------|---------------|
| Anaerobic digester                                                              | LowA                               | LowB          | Fast          | Slow          | LowA                               | LowB          | Fast          | Slow          |
| <b>Performance</b>                                                              |                                    |               |               |               |                                    |               |               |               |
| Biogas Production Rate (L·L <sup>-1</sup> ·d <sup>-1</sup> )                    | 0.453 ± 0.061                      | 0.467 ± 0.071 | 0.356 ± 0.124 | 0.444 ± 0.071 | 0.741 ± 0.072                      | 0.76 ± 0.06   | 0.727 ± 0.056 | 0.718 ± 0.042 |
| Specific Methane Yield (L CH <sub>4</sub> ·gVS <sup>-1</sup> ·d <sup>-1</sup> ) | NA                                 | NA            | NA            | NA            | 0.21 ± 0.014                       | 0.211 ± 0.018 | 0.188 ± 0.017 | 0.195 ± 0.013 |
| Methane Content (%)                                                             | NA                                 | NA            | NA            | NA            | 54 ± 1                             | 54 ± 1        | 54 ± 1        | 54 ± 1        |
| VS Reduction Efficiency (%)                                                     | 43.4 ± 4.4                         | 42.7 ± 4.6    | 42 ± 4.2      | 42.7 ± 3.5    | 47.7 ± 4.1                         | 47.6 ± 4.3    | 46.3 ± 2      | 49.5 ± 3.8    |
| Soluble COD Reduction Efficiency (%)                                            | NA                                 | NA            | NA            | NA            | 63 ± 7                             | 54 ± 22       | 65 ± 7        | 61 ± 11       |
| <b>Period</b>                                                                   | <b>Period 2 (P2; Days 203-264)</b> |               |               |               | <b>Period 3 (P3; Days 265-306)</b> |               |               |               |
| Anaerobic digester                                                              | LowA                               | LowB          | Fast          | Slow          | LowA                               | LowB          | Fast          | Slow          |
| <b>Performance</b>                                                              |                                    |               |               |               |                                    |               |               |               |
| Biogas Production Rate (L·L <sup>-1</sup> ·d <sup>-1</sup> )                    | 0.706 ± 0.11                       | 0.716 ± 0.105 | 0.755 ± 0.043 | 0.732 ± 0.046 | 0.608 ± 0.032                      | 0.653 ± 0.052 | 0.409 ± 0.275 | 0.722 ± 0.044 |
| Specific Methane Yield (L CH <sub>4</sub> ·gVS <sup>-1</sup> ·d <sup>-1</sup> ) | 0.189 ± 0.027                      | 0.192 ± 0.026 | 0.2 ± 0.013   | 0.195 ± 0.014 | 0.17 ± 0.009                       | 0.18 ± 0.015  | 0.108 ± 0.086 | 0.2 ± 0.013   |
| Methane Content (%)                                                             | 54 ± 3                             | 54 ± 3        | 53 ± 3        | 53 ± 2        | 56 ± 2                             | 55 ± 1        | 44 ± 16       | 55 ± 2        |
| VS Reduction Efficiency (%)                                                     | 47.7 ± 4                           | 46.4 ± 3.9    | 47 ± 4.5      | 47.4 ± 1.6    | 44.8 ± 5.1                         | 48.1 ± 4      | 42.1 ± 6      | 48.1 ± 2.6    |
| Soluble COD Reduction Efficiency (%)                                            | 64 ± 7                             | 65 ± 5        | 67 ± 3        | 66 ± 5        | 57 ± 3                             | 60 ± 4        | 37 ± 35       | 65 ± 5        |
| <b>Period</b>                                                                   | <b>Period 4 (P4; Days 307-383)</b> |               |               |               |                                    |               |               |               |
| Anaerobic digester                                                              | LowA                               | LowB          | Fast          | Slow          |                                    |               |               |               |
| <b>Performance</b>                                                              |                                    |               |               |               |                                    |               |               |               |
| Biogas Production Rate (L·L <sup>-1</sup> ·d <sup>-1</sup> )                    | 0.587 ± 0.033                      | 0.636 ± 0.034 |               | 0.587 ± 0.075 |                                    |               |               |               |
| Specific Methane Yield (L CH <sub>4</sub> ·gVS <sup>-1</sup> ·d <sup>-1</sup> ) | 0.161 ± 0.009                      | 0.176 ± 0.009 |               | 0.159 ± 0.022 |                                    |               |               |               |

|                                      |            |          |  |            |
|--------------------------------------|------------|----------|--|------------|
| Methane Content (%)                  | 55 ± 1     | 55 ± 1   |  | 55 ± 2     |
| VS Reduction Efficiency (%)          | 40.4 ± 3.7 | 42.1 ± 6 |  | 41.5 ± 3.6 |
| Soluble COD Reduction Efficiency (%) | 50 ± 5     | 55 ± 5   |  | 57 ± 7     |

**Table S5**

| <b>Period</b>                                                  | <b>Startup (Days 1-114)</b>        |             |             |             | <b>Period 1 (P1; Days 115-202)</b> |             |             |             |
|----------------------------------------------------------------|------------------------------------|-------------|-------------|-------------|------------------------------------|-------------|-------------|-------------|
| Anaerobic digester                                             | LowA                               | LowB        | Fast        | Slow        | LowA                               | LowB        | Fast        | Slow        |
| <b>Stability Parameters</b>                                    |                                    |             |             |             |                                    |             |             |             |
| pH                                                             | 7.37 ± 0.07                        | 7.38 ± 0.08 | 7.39 ± 0.08 | 7.38 ± 0.07 | 7.23 ± 0.09                        | 7.23 ± 0.09 | 7.22 ± 0.08 | 7.23 ± 0.11 |
| tVFA Concentration (mg Ac·L <sup>-1</sup> )                    | 184 ± 38                           | 250 ± 123   | 237 ± 173   | 165 ± 39    | 161 ± 23                           | 154 ± 21    | 130 ± 14    | 140 ± 28    |
| Total Alkalinity (g CaCO <sub>3</sub> ·L <sup>-1</sup> )       | NA                                 | NA          | NA          | NA          | 5.7 ± 0.1                          | 5.8 ± 0.1   | 5.8 ± 0.1   | 5.9 ± 0.1   |
| Bicarbonate Alkalinity (g CaCO <sub>3</sub> ·L <sup>-1</sup> ) | NA                                 | NA          | NA          | NA          | 5.6 ± 0.1                          | 5.7 ± 0.1   | 5.7 ± 0.1   | 5.8 ± 0     |
| TS Concentration (g·L <sup>-1</sup> )                          | 38.3 ± 3.2                         | 39.1 ± 3.9  | 39.7 ± 3.3  | 39.2 ± 2.8  | 31.5 ± 2.4                         | 31.7 ± 2.3  | 32.2 ± 1.2  | 30.7 ± 2.2  |
| VS Concentration (g·L <sup>-1</sup> )                          | 28.3 ± 2.2                         | 28.7 ± 2.3  | 29 ± 2.1    | 28.7 ± 1.7  | 26.1 ± 2                           | 26.2 ± 2.1  | 26.9 ± 1    | 25.3 ± 1.9  |
| Soluble COD concentration (g O <sub>2</sub> ·L <sup>-1</sup> ) | NA                                 | NA          | NA          | NA          | 3.48 ± 0.66                        | 4.43 ± 2.09 | 3.33 ± 0.63 | 3.72 ± 0.98 |
| Total Ammonium concentration (g N·L <sup>-1</sup> )            | NA                                 | NA          | NA          | NA          | 0.79 ± 0.01                        | 0.81 ± 0.02 | 0.75 ± 0.05 | 0.84 ± 0.02 |
| <b>Period</b>                                                  | <b>Period 2 (P2; Days 203-264)</b> |             |             |             | <b>Period 3 (P3; Days 265-306)</b> |             |             |             |
| Anaerobic digester                                             | LowA                               | LowB        | Fast        | Slow        | LowA                               | LowB        | Fast        | Slow        |
| <b>Stability Parameters</b>                                    |                                    |             |             |             |                                    |             |             |             |
| pH                                                             | 7.22 ± 0.07                        | 7.22 ± 0.08 | 7.17 ± 0.08 | 7.21 ± 0.09 | 7.22 ± 0.04                        | 7.21 ± 0.05 | 6.71 ± 0.48 | 7.14 ± 0.07 |
| tVFA Concentration (mg Ac·L <sup>-1</sup> )                    | 117 ± 23                           | 119 ± 18    | 112 ± 23    | 107 ± 20    | 128 ± 15                           | 122 ± 17    | 2473 ± 2426 | 108 ± 10    |
| Total Alkalinity (g CaCO <sub>3</sub> ·L <sup>-1</sup> )       | 6.4 ± 0.5                          | 6.3 ± 0.6   | 5.9 ± 0.1   | 5.9 ± 0.1   | 7 ± 0.1                            | 6.9 ± 0.1   | 5.7 ± 0.4   | 6 ± 0.1     |
| Bicarbonate Alkalinity (g CaCO <sub>3</sub> ·L <sup>-1</sup> ) | 6.3 ± 0.5                          | 6.2 ± 0.6   | 5.8 ± 0.2   | 5.8 ± 0.1   | 6.9 ± 0.1                          | 6.8 ± 0.1   | 3.8 ± 2.1   | 6 ± 0.1     |
| TS Concentration (g·L <sup>-1</sup> )                          | 31 ± 2.5                           | 32.1 ± 1.9  | 31.5 ± 2.3  | 31.1 ± 0.8  | 32.9 ± 2.7                         | 31.3 ± 2.2  | 34.1 ± 3.1  | 30.9 ± 1.2  |
| VS Concentration (g·L <sup>-1</sup> )                          | 26.1 ± 2                           | 26.8 ± 2    | 26.5 ± 2.3  | 26.3 ± 0.8  | 27.7 ± 2.5                         | 26 ± 2      | 29 ± 3      | 25.9 ± 1.4  |
| Soluble COD concentration (g O <sub>2</sub> ·L <sup>-1</sup> ) | 3.29 ± 0.47                        | 3.27 ± 0.3  | 3.09 ± 0.32 | 3.28 ± 0.45 | 3.63 ± 0.28                        | 3.33 ± 0.34 | 7.34 ± 5.11 | 3.28 ± 0.5  |
| Total Ammonium concentration (g N·L <sup>-1</sup> )            | 0.95 ± 0.11                        | 0.96 ± 0.11 | 0.85 ± 0.05 | 0.82 ± 0.04 | 1.11 ± 0.1                         | 1.12 ± 0.08 | 0.96 ± 0.1  | 0.84 ± 0.05 |
| <b>Period</b>                                                  | <b>Period 4 (P4; Days 307-383)</b> |             |             |             |                                    |             |             |             |
| Anaerobic digester                                             | LowA                               | LowB        | Fast        | Slow        |                                    |             |             |             |



| <b>Stability Parameters</b>                                    |             |             |  |             |
|----------------------------------------------------------------|-------------|-------------|--|-------------|
| pH                                                             | 7.23 ± 0.08 | 7.22 ± 0.07 |  | 7.14 ± 0.1  |
| tVFA Concentration (mg Ac·L <sup>-1</sup> )                    | 155 ± 29    | 162 ± 27    |  | 384 ± 446   |
| Total Alkalinity (g CaCO <sub>3</sub> ·L <sup>-1</sup> )       | 7.2 ± 0.2   | 7.2 ± 0.1   |  | 6.3 ± 0.2   |
| Bicarbonate Alkalinity (g CaCO <sub>3</sub> ·L <sup>-1</sup> ) | 7 ± 0.2     | 7.1 ± 0.1   |  | 6 ± 0.3     |
| TS Concentration (g·L <sup>-1</sup> )                          | 35 ± 1.9    | 32.4 ± 1.2  |  | 34.1 ± 1.9  |
| VS Concentration (g·L <sup>-1</sup> )                          | 29.8 ± 1.9  | 27.1 ± 1.1  |  | 29.2 ± 1.8  |
| Soluble COD concentration (g O <sub>2</sub> ·L <sup>-1</sup> ) | 4.13 ± 0.38 | 3.77 ± 0.39 |  | 4.13 ± 0.69 |
| Total Ammonium concentration (g N·L <sup>-1</sup> )            | 1.13 ± 0.1  | 1.2 ± 0.14  |  | 0.9 ± 0.15  |

**Table S6**

| <b>Anaerobic digester</b> | <b>Day</b> | <b>Acetate concentration (mM)</b> | <b>Propionate concentration (mM)</b> | <b><i>n</i>-Butyrate concentration (mM)</b> | <b>tVFA concentration measured (mmol Ac·L<sup>-1</sup>)</b> |
|---------------------------|------------|-----------------------------------|--------------------------------------|---------------------------------------------|-------------------------------------------------------------|
| Low A                     | 219        | 0.24                              | ND                                   | ND                                          | 1.69                                                        |
| Low A                     | 245        | 0.20                              | ND                                   | ND                                          | 1.69                                                        |
| Low A                     | 285        | 0.14                              | ND                                   | ND                                          | 1.69                                                        |
| Low A                     | 345        | 0.11                              | ND                                   | ND                                          | 3.17                                                        |
| Low B                     | 247        | 0.13                              | ND                                   | ND                                          | 1.79                                                        |
| Low B                     | 323        | 0.17                              | ND                                   | ND                                          | 2.34                                                        |
| Low B                     | 333        | 0.11                              | ND                                   | ND                                          | 2.34                                                        |
| Low B                     | 345        | 0.42                              | ND                                   | ND                                          | 3.01                                                        |
| Low B                     | 353        | 0.90                              | ND                                   | ND                                          | 3.39                                                        |
| Fast                      | 243        | 0.62                              | 0.45                                 | ND                                          | 1.60                                                        |
| Fast                      | 285        | 7.36                              | ND                                   | ND                                          | 4.35                                                        |
| Fast                      | 293        | 38.98                             | 3.69                                 | 1.15                                        | 55.57                                                       |
| Fast                      | 307        | 38.61                             | 9.86                                 | 2.81                                        | 102.69                                                      |
| Slow                      | 321        | 0.52                              | ND                                   | ND                                          | 2.18                                                        |
| Slow                      | 323        | 1.31                              | ND                                   | ND                                          | 3.33                                                        |
| Slow                      | 333        | 11.64                             | 1.68                                 | ND                                          | 28.61                                                       |
| Slow                      | 345        | 0.56                              | ND                                   | ND                                          | 3.33                                                        |
| Slow                      | 353        | 0.38                              | ND                                   | ND                                          | 2.72                                                        |

**Table S7**

| <b>OTU ID</b> | <b>Taxonomy</b>                                                                                                                   | <b>Fast Digester</b> | <b>All Digesters</b> |
|---------------|-----------------------------------------------------------------------------------------------------------------------------------|----------------------|----------------------|
| 842598        | k__Archaea; p__Euryarchaeota; c__Methanobacteria;<br>o__Methanobacteriales; f__Methanobacteriaceae;<br>g__Methanobrevibacter; s__ | N                    | N                    |
| 628811        | k__Bacteria; p__Armatimonadetes; c__SJA-176;<br>o__TP122; f__ ; g__ ; s__                                                         | N                    | N                    |
| 837605        | k__Bacteria; p__Bacteroidetes; c__Bacteroidia;<br>o__Bacteroidales; f__ ; g__ ; s__                                               | Y                    | Y                    |
| 559410        | k__Bacteria; p__Bacteroidetes; c__Bacteroidia;<br>o__Bacteroidales; f__ ; g__ ; s__                                               | N                    | N                    |
| 4059526       | k__Bacteria; p__Bacteroidetes; c__Bacteroidia;<br>o__Bacteroidales; f__ ; g__ ; s__                                               | N                    | N                    |
| 4443296       | k__Bacteria; p__Bacteroidetes; c__Bacteroidia;<br>o__Bacteroidales; f__ ; g__ ; s__                                               | N                    | N                    |
| 1891861       | k__Bacteria; p__Bacteroidetes; c__Bacteroidia;<br>o__Bacteroidales; f__[Paraprevotellaceae];<br>g__YRC22; s__                     | N                    | N                    |
| 541252        | k__Bacteria; p__Bacteroidetes; c__Bacteroidia;<br>o__Bacteroidales; f__Porphyromonadaceae; g__ ; s__                              | Y                    | Y                    |
| 3506234       | k__Bacteria; p__Bacteroidetes; c__Bacteroidia;<br>o__Bacteroidales; f__Porphyromonadaceae; g__ ; s__                              | Y                    | Y                    |
| 4383641       | k__Bacteria; p__Bacteroidetes; c__Bacteroidia;<br>o__Bacteroidales; f__Porphyromonadaceae; g__ ; s__                              | Y                    | Y                    |
| 1764554       | k__Bacteria; p__Bacteroidetes; c__Bacteroidia;<br>o__Bacteroidales; f__Porphyromonadaceae;<br>g__Parabacteroides; s__             | N                    | N                    |
| 258334        | k__Bacteria; p__Chloroflexi; c__Anaerolineae;<br>o__Anaerolineales; f__Anaerolinaceae; g__T78; s__                                | Y                    | N                    |
| 809315        | k__Bacteria; p__Chloroflexi; c__Anaerolineae;<br>o__Anaerolineales; f__Anaerolinaceae; g__T78; s__                                | Y                    | N                    |
| 591951        | k__Bacteria; p__Firmicutes; c__Clostridia;<br>o__Clostridiales; f__ ; g__ ; s__                                                   | N                    | N                    |
| 178657        | k__Bacteria; p__Firmicutes; c__Clostridia;<br>o__Clostridiales; f__Clostridiaceae; g__Clostridium;<br>s__                         | N                    | N                    |
| 675613        | k__Bacteria; p__Firmicutes; c__Clostridia;<br>o__Clostridiales; f__Peptococcaceae;<br>g__Pelotomaculum; s__                       | Y                    | Y                    |
| 550485        | k__Bacteria; p__Firmicutes; c__Clostridia;<br>o__Clostridiales; f__Ruminococcaceae; g__ ; s__                                     | N                    | N                    |
| 582502        | k__Bacteria; p__Firmicutes; c__Clostridia;<br>o__Clostridiales; f__Ruminococcaceae; g__ ; s__                                     | N                    | N                    |
| 743075        | k__Bacteria; p__Firmicutes; c__Clostridia;<br>o__Clostridiales; f__Ruminococcaceae; g__ ; s__                                     | N                    | N                    |

|         |                                                                                                                                |   |   |
|---------|--------------------------------------------------------------------------------------------------------------------------------|---|---|
| 539716  | k_Bacteria; p_Firmicutes; c_Clostridia;<br>o_Clostridiales; f_Syntrophomonadaceae;<br>g_Syntrophomonas; s_                     | N | N |
| 820298  | k_Bacteria; p_OP11; c_WCHB1-64; o_d153;<br>f_ ; g_ ; s_                                                                        | N | N |
| 286595  | k_Bacteria; p_Proteobacteria;<br>c_Deltaproteobacteria; o_Desulfovibrionales;<br>f_Desulfomicrobiaceae; g_Desulfomicrobium; s_ | N | N |
| 4353504 | k_Bacteria; p_Spirochaetes; c_Spirochaetes;<br>o_Spirochaetales; f_Spirochaetaceae;<br>g_Treponema; s_                         | N | N |
| 767422  | k_Bacteria; p_Synergistetes; c_Synergistia;<br>o_Synergistales; f_Dethiosulfovibrionaceae;<br>g_HA73; s_                       | Y | Y |
| 703270  | k_Bacteria; p_Synergistetes; c_Synergistia;<br>o_Synergistales; f_Synergistaceae; g_vadinCA02;<br>s_                           | N | N |
| 616150  | k_Bacteria; p_Verrucomicrobia; c_Opitutae;<br>o_Puniceicoccales; f_Puniceicoccaceae; g_ ; s_                                   | N | N |

**Table S8**

| <b>OTU ID</b> | <b>Taxonomy</b>                                                                                                            | <b>Fast Digester</b> | <b>All Digesters</b> |
|---------------|----------------------------------------------------------------------------------------------------------------------------|----------------------|----------------------|
| 752382        | k__Bacteria; p__Bacteroidetes; c__Bacteroidia;<br>o__Bacteroidales; f__ ; g__ ; s__                                        | Y                    | Y                    |
| 111350        | k__Bacteria; p__Bacteroidetes; c__Bacteroidia;<br>o__Bacteroidales; f__ ; g__ ; s__                                        | Y                    | N                    |
| 1144358       | k__Bacteria; p__Bacteroidetes; c__Bacteroidia;<br>o__Bacteroidales; f__ ; g__ ; s__                                        | Y                    | N                    |
| 4471301       | k__Bacteria; p__Bacteroidetes; c__Bacteroidia;<br>o__Bacteroidales; f__ ; g__ ; s__                                        | Y                    | N                    |
| 509055        | k__Bacteria; p__Bacteroidetes; c__Bacteroidia;<br>o__Bacteroidales; f__ ; g__ ; s__                                        | N                    | N                    |
| 562538        | k__Bacteria; p__Bacteroidetes; c__Bacteroidia;<br>o__Bacteroidales; f__ ; g__ ; s__                                        | N                    | N                    |
| 681365        | k__Bacteria; p__Bacteroidetes; c__Bacteroidia;<br>o__Bacteroidales; f__ ; g__ ; s__                                        | N                    | N                    |
| 787023        | k__Bacteria; p__Bacteroidetes; c__Bacteroidia;<br>o__Bacteroidales; f__ ; g__ ; s__                                        | N                    | N                    |
| 4468051       | k__Bacteria; p__Bacteroidetes; c__Bacteroidia;<br>o__Bacteroidales; f__Bacteroidaceae; g__ ; s__                           | Y                    | N                    |
| 549570        | k__Bacteria; p__Bacteroidetes; c__Bacteroidia;<br>o__Bacteroidales; f__SB-1; g__ ; s__                                     | Y                    | Y                    |
| 550996        | k__Bacteria; p__Firmicutes; c__Clostridia;<br>o__Clostridiales; f__Lachnospiraceae;<br>g__Coprococcus; s__                 | Y                    | N                    |
| 3273469       | k__Bacteria; p__Firmicutes; c__Clostridia;<br>o__Clostridiales; f__Ruminococcaceae; g__ ; s__                              | Y                    | Y                    |
| 562603        | k__Bacteria; p__Proteobacteria;<br>c__Deltaproteobacteria; o__Syntrophobacterales;<br>f__Syntrophaceae; g__Syntrophus; s__ | Y                    | Y                    |
| 736489        | k__Bacteria; p__Proteobacteria;<br>c__Deltaproteobacteria; o__Syntrophobacterales;<br>f__Syntrophaceae; g__Syntrophus; s__ | Y                    | Y                    |
| 279151        | k__Bacteria; p__Tenericutes; c__Mollicutes;<br>o__RF39; f__ ; g__ ; s__                                                    | Y                    | Y                    |
| 111131        | k__Bacteria; p__WWE1; c__[Cloacamonae];<br>o__[Cloacamonales]; f__[Cloacamonaceae];<br>g__Candidatus Cloacamonas; s__      | Y                    | Y                    |
| 534698        | k__Bacteria; p__WWE1; c__[Cloacamonae];<br>o__[Cloacamonales]; f__[Cloacamonaceae]; g__W5;<br>s__                          | N                    | N                    |

**Table S9**

| Day | Period  | Number of Samples Processed Per Anaerobic digester |       |      |      |
|-----|---------|----------------------------------------------------|-------|------|------|
|     |         | Low A                                              | Low B | Fast | Slow |
| 0   | Startup | 2                                                  | 1     | 2    | 2    |
| 5   | Startup | 1                                                  | 1     | 1    | 1    |
| 27  | Startup | 1                                                  | 1     | 1    | 1    |
| 52  | Startup | 1                                                  | 1     | 1    | 1    |
| 77  | Startup | 1                                                  | 1     | 1    | 1    |
| 97  | Startup | 1                                                  | 1     | 1    | 1    |
| 119 | P1      | 1                                                  | 1     | 1    | 1    |
| 133 | P1      | 1                                                  | 1     | 1    | 1    |
| 147 | P1      | 1                                                  | 1     | 1    | 1    |
| 175 | P1      | 1                                                  | 1     | 1    | 1    |
| 189 | P1      | 1                                                  | 1     | 1    | 1    |
| 201 | P1      | 1                                                  | 1     | 1    | 1    |
| 203 | P2      | 1                                                  | 1     | 1    | 1    |
| 209 | P2      | 1                                                  | 1     | 1    | 1    |
| 215 | P2      | 1                                                  | 1     | 1    | 1    |
| 217 | P2      | 1                                                  | 1     | 1    | 1    |
| 223 | P2      | 1                                                  | 1     | 1    | 1    |
| 231 | P2      | 1                                                  | 1     | 1    | 1    |
| 237 | P2      | 1                                                  | 1     | 1    | 1    |
| 243 | P2      | 1                                                  | 1     | 1    | 1    |
| 249 | P2      | 1                                                  | 1     | 1    | 1    |
| 255 | P2      | 1                                                  | 1     | 1    | 1    |
| 257 | P2      | 1                                                  | 1     | 1    | 1    |
| 265 | P3      | 1                                                  | 1     | 1    | 1    |
| 273 | P3      | 1                                                  | 1     | 1    | 1    |
| 281 | P3      | 1                                                  | 1     | 1    | 1    |
| 287 | P3      | 1                                                  | 1     | 1    | 1    |
| 291 | P3      | 0                                                  | 0     | 1    | 1    |
| 297 | P3      | 1                                                  | 1     | 1    | 1    |
| 299 | P3      | 0                                                  | 0     | 1    | 1    |
| 301 | P3      | 1                                                  | 1     | 1    | 1    |
| 307 | P4      | 1                                                  | 1     | 1    | 1    |
| 315 | P4      | 1                                                  | 1     | 0    | 1    |
| 321 | P4      | 0                                                  | 0     | 0    | 1    |
| 329 | P4      | 1                                                  | 1     | 0    | 1    |
| 333 | P4      | 1                                                  | 1     | 0    | 1    |
| 339 | P4      | 0                                                  | 0     | 0    | 1    |
| 343 | P4      | 1                                                  | 1     | 0    | 1    |
| 349 | P4      | 1                                                  | 1     | 1    | 1    |
| 355 | P4      | 0                                                  | 1     | 1    | 0    |

|     |    |   |   |   |   |
|-----|----|---|---|---|---|
| 356 | P4 | 0 | 1 | 1 | 0 |
| 357 | P4 | 1 | 0 | 0 | 1 |
| 363 | P4 | 1 | 0 | 0 | 1 |
| 369 | P4 | 1 | 0 | 0 | 1 |
| 381 | P4 | 1 | 0 | 0 | 1 |
| 383 | P4 | 1 | 0 | 0 | 1 |
